# Supplementary material for: Evaluation of Aggregated Ag85B Antigen for Its Biophysical Properties, Immunogenicity, and Vaccination Potential in a Murine Model of Tuberculosis Infection
Source: PubMed Central journal article supplement (PMC5711810; doi:10.3389/fimmu.2017.01608), 2017-11-27
Supplement: data_sheet_1.pdf [file data_sheet_1.pdf]

1 **Supplementary Information**

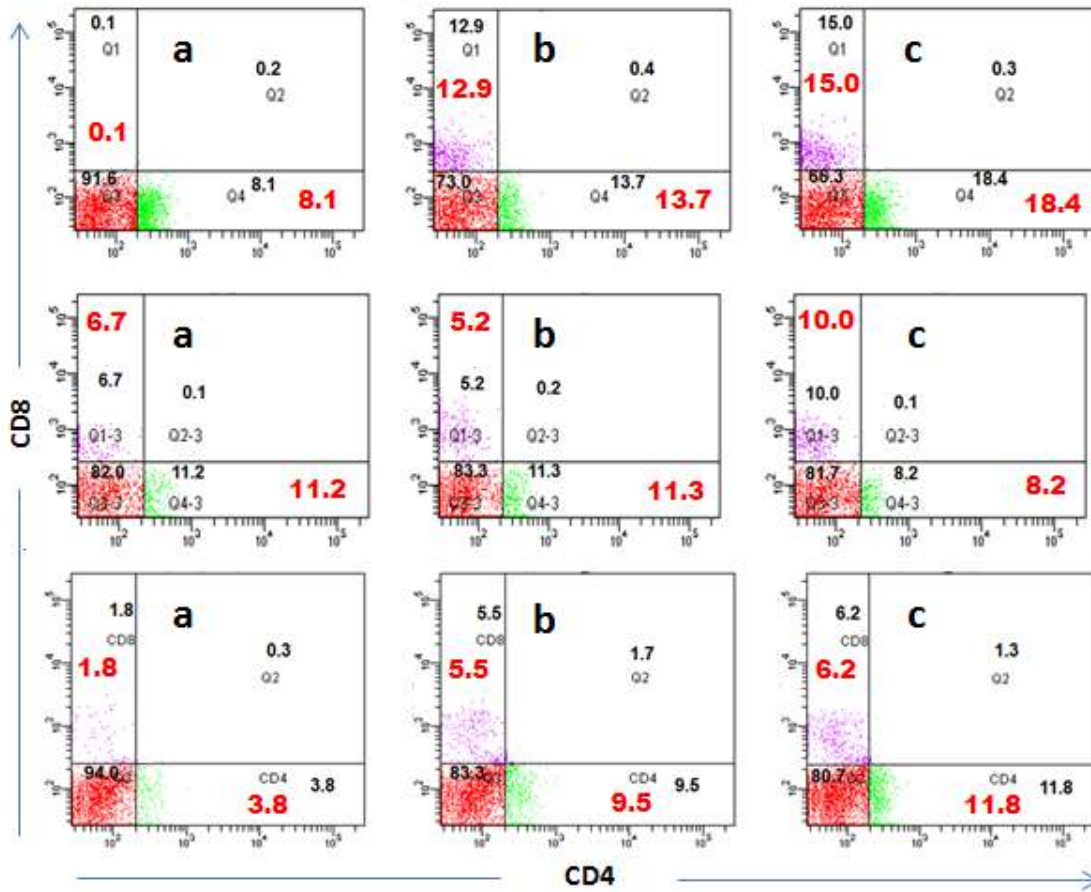

2

3 **Fig.S1. Immunization with amyloid Rv1886c (F2) resulted in better proliferation of CD8+**  
 4 **CTLs.**

5 Shown in the figure are the representative FACS quadrant plots corresponding to percentage  
 6 induction of both CD4+ & CD8+ T cells in the CD3 gated spenocytes of various immunized  
 7 groups viz. BCG (a), Rv1886c-IFA or F1 (b), and amyloid form of Rv1886c or F2 (c). The data  
 8 in upper, middle and lower panels of the figure belongs to 2, 6 and 10 weeks post infection time  
 9 points respectively.

10

11

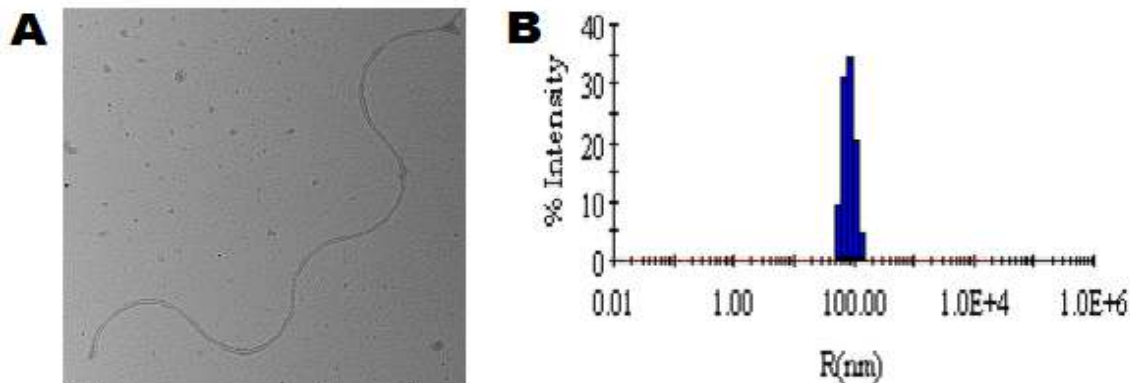

12

13

14 **Fig.S2. Size analysis of as-synthesized Rv1886c amyloid (F2).**

15 (A). Transmission Electron Micrography (TEM) image shows the agitation induced  
16 transformation of native Rv1886c into nano sized amyloidal structure. (B). Dynamic Light  
17 Scattering (DLS) aided measurement of Rv1886c amyloid revealed average size of 77.46 nm and  
18 polydispersity index of 24.8%. Results are representative of at least three different experiments.

19
